# Supplementary material for: Adipocyte-targeted celastrol delivery via biguanide-modified micelles improves treatment of obesity in DIO mice
Source: Royal Society of Chemistry journal article supplement (doi:10.1039/d4tb00777h), 2024-01-01
Supplement: d4tb00777h1.pdf [file d4tb00777h1.pdf]

## Supplementary Information

### **Adipocyte-targeted Celastrol Delivery via Biguanide-modified Micelles Improves Treatment of Obesity in DIO Mice**

Hongling Ouyang,<sup>a</sup> Yunxiao Zhang,<sup>a</sup> Yueting Zhu,<sup>a</sup> Tao Gong,<sup>a</sup> Zhirong Zhang<sup>a</sup> and Author Yao Fu <sup>\*a</sup>

a Key Laboratory of Drug- Targeting and Drug Delivery System of the Education Ministry and Sichuan Province,  
Sichuan Engineering Laboratory for Plant-Sourced Drug and Sichuan Research Center for Drug Precision Industrial  
Technology, West China School of Pharmacy, Sichuan University, Chengdu, 610041, China.

\*Address correspondence to yfu4@scu.edu.cn (Y. Fu).

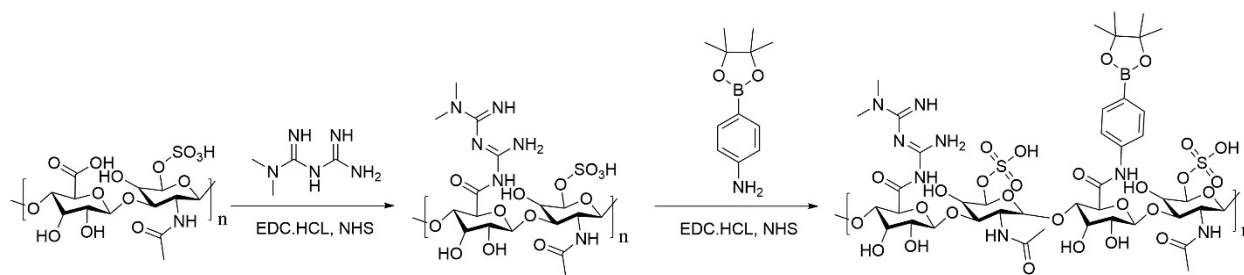

**Scheme 1.** Scheme of synthesis routes of MET-CS-PBE.

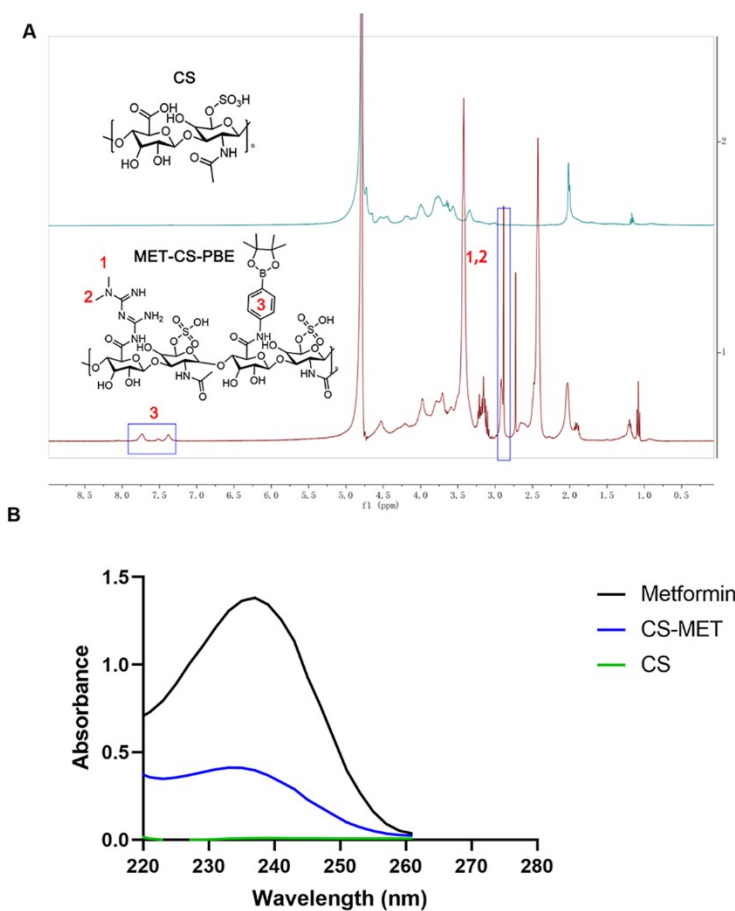

**Fig. S1.** Characterization of MET-CS-PBE materials. (A) Comparison of  $^1\text{H}$  NMR ( $\text{D}_2\text{O}$ ) spectrum of MET-CS-PBE and CS. (B) the maximum absorption wave of CS-MET measured by ultraviolet spectrophotometer.

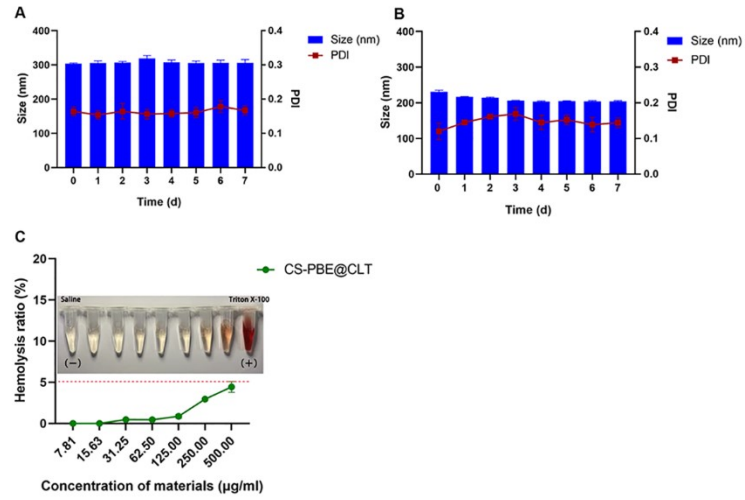

**Fig. S2.** Micellar stability and serum stability. (A-B) The stability of MET-CS-PBE (A) and MET-CS-PBE@CLT (B) micelles. (C) The hemolysis rate of CS-PBE@CLT.

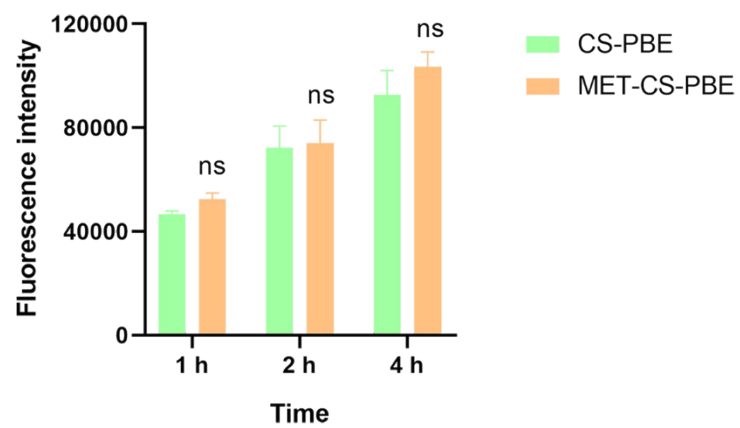

**Fig. S3.** The uptake efficiency of MET-CS-PBE and CS-PBE micelles in RAW 264.7.

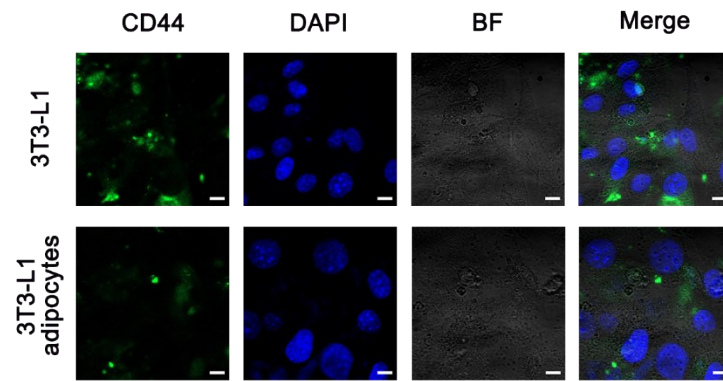

**Fig. S4.** Confocal microscopic images of CD44 expression difference on 3T3-L1 and 3T3-L1 adipocytes.

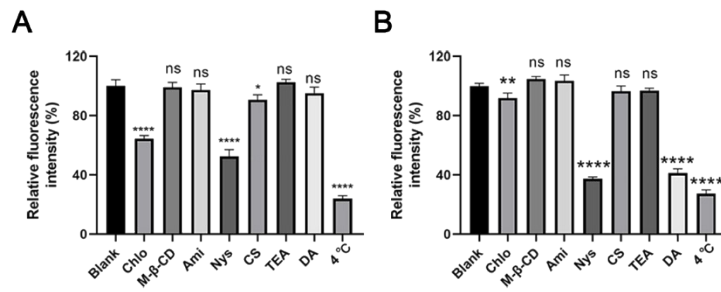

**Fig. S5.** The fluorescence intensity of 3T3-L1 preadipocytes accumulation of micelles after 2 h incubation in the presence of different inhibitors of distinct cell endocytosis mechanisms.

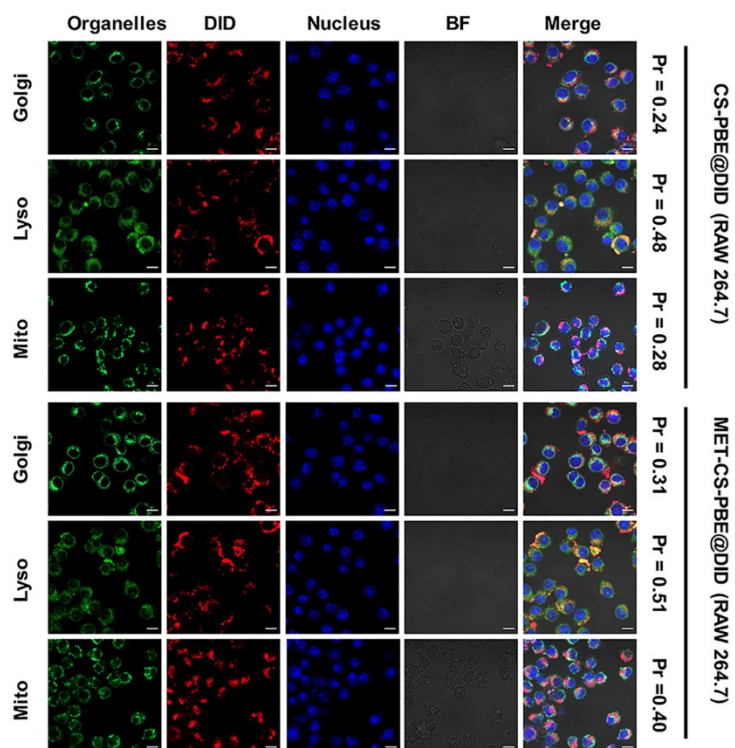

**Fig. S6.** The intracellular distribution of CS-PBE micelles and MET-CS-PBE micelles in RAW 264.7. Scale bar, 10  $\mu\text{m}$ .

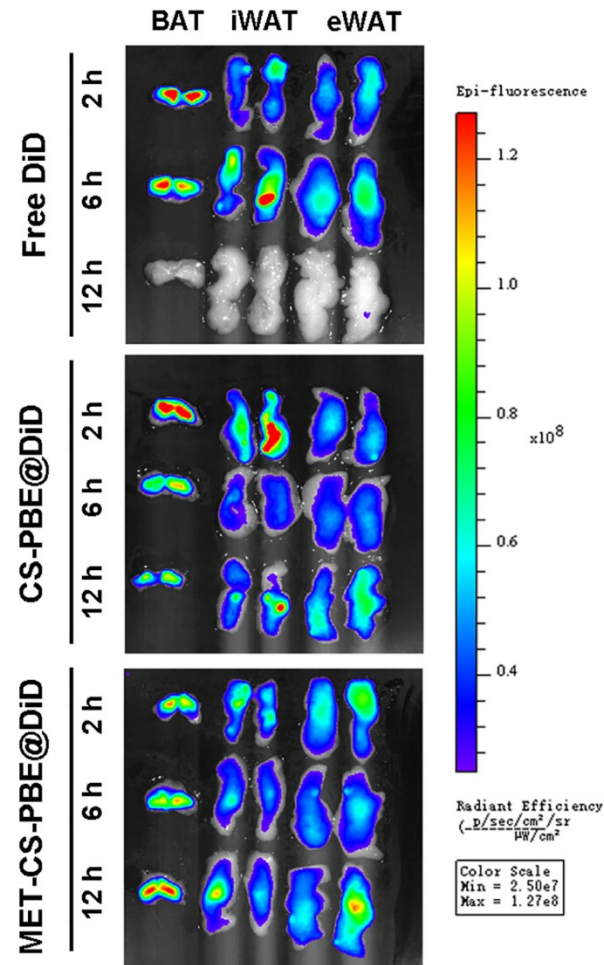

Fig. S7. *In vivo* IVIS images of adipose tissues after intravenous injection for 2, 6, 12 h.



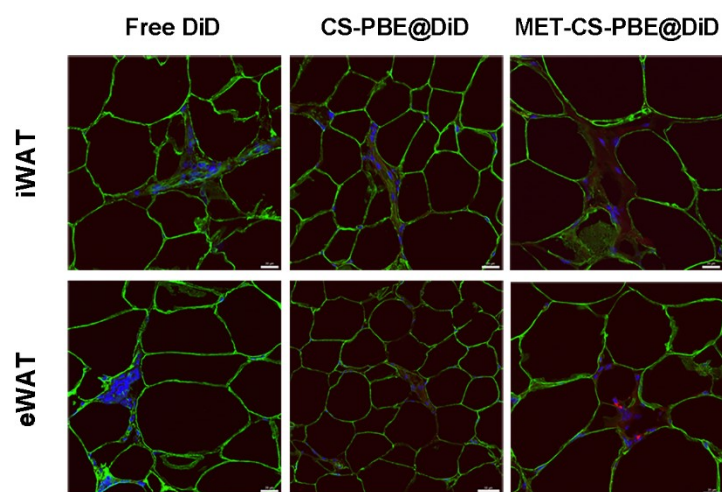

**Fig. S8.** Immunofluorescence image of the localization of DiD-loaded micelles within iWAT and eWAT. Red, Free DiD, CS-PBE@DiD, or MET-CS-PBE@DiD micelle. Green, caveolin. Blue, cell nuclei. Scale bar, 20  $\mu\text{m}$ .

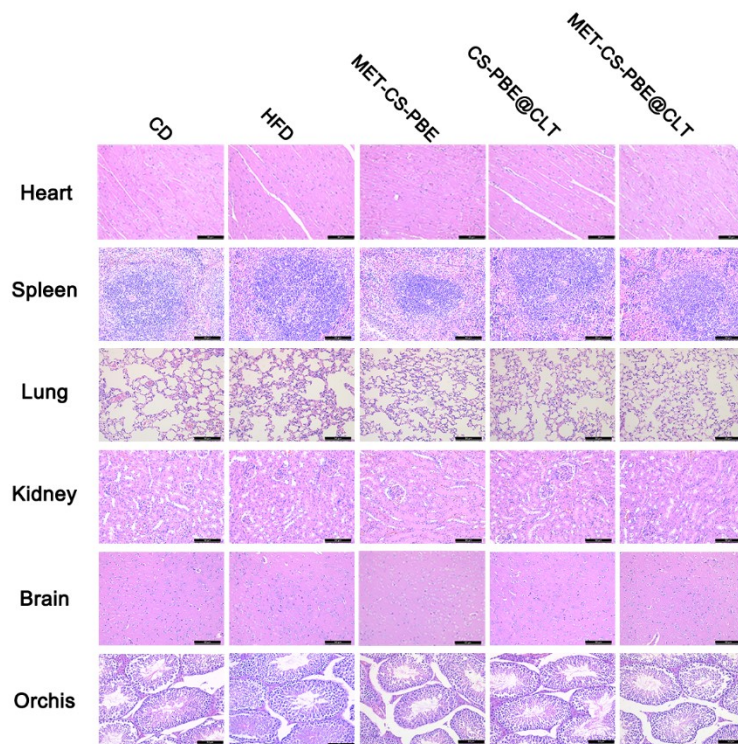

**Fig. S9.** Representative H&E histological images of major organs from treatment groups. Scale bar, 50  $\mu$ m.
