# Supplementary material for: Adipocyte-targeted celastrol delivery via biguanide-modified micelles improves treatment of obesity in DIO mice
Source: Royal Society of Chemistry journal article supplement (doi:10.1039/d4tb00777h), 2024-01-01

Electronic Supplementary Material (ESI) for Journal of Materials Chemistry B.  
This journal is © The Royal Society of Chemistry 2024

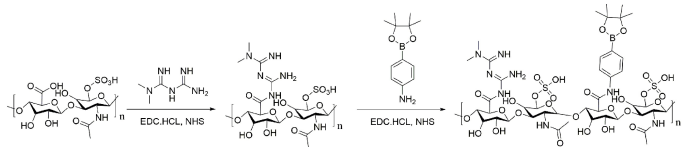

Supplement: d4tb00777h2.pdf [file d4tb00777h2.pdf]
